# Supplementary material for: The Effect of Screen-to-Screen Versus Face-to-Face Consultation on Doctor-Patient Communication: An Experimental Study with Simulated Patients
Source: PubMed Central journal article supplement (PMC5752968; doi:10.2196/jmir.8033), 2017-12-20
Supplement: jmir_v19i12e421_app1.pdf [file jmir_v19i12e421_app1.pdf]

## Consultations

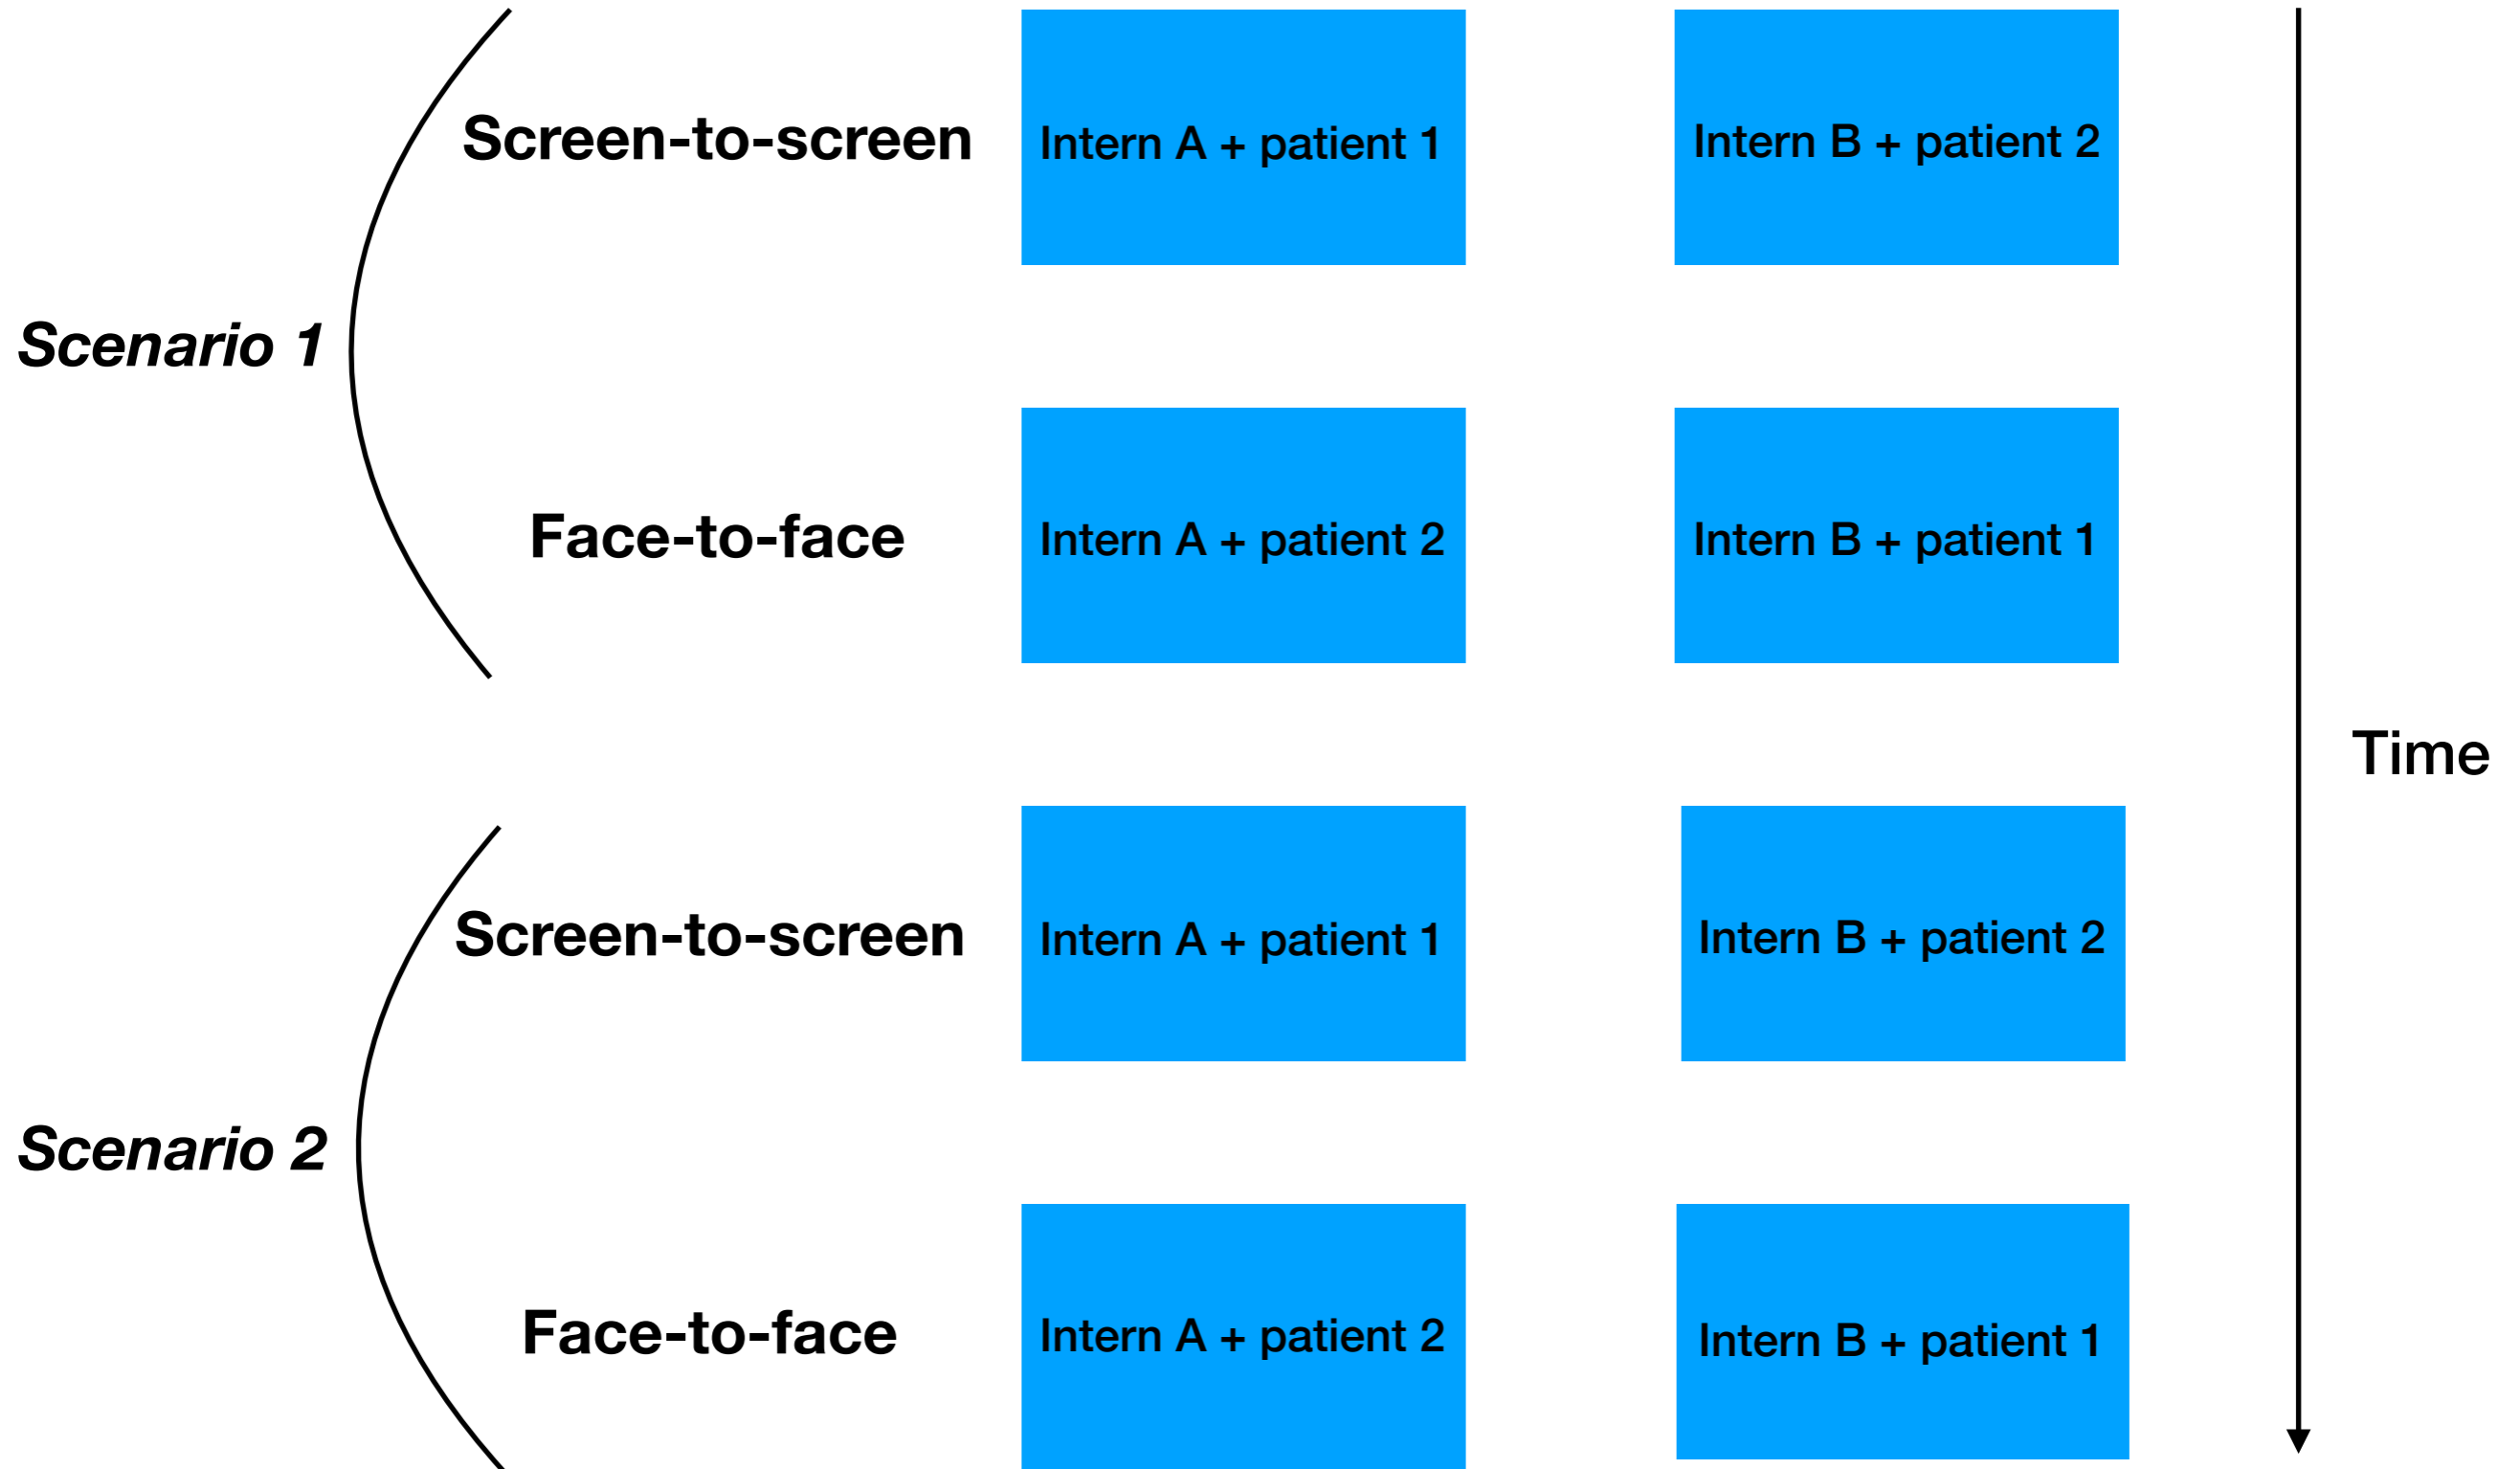

This is an example of a session, there were a total of six sessions. In each session participated 2 interns and 2 simulated patients.
